# Supplementary material for: Validation of a risk prediction tool for coronary heart disease in middle-aged women
Source: Springer Nature journal article supplement (doi:10.1186/s12905-015-0250-x), 2015-11-10
Supplement: MOESM1 [file 9754902]

### Sample YDR Relative Risk Calculation

$$RR = \frac{RR_{I1} * RR_{I2} * \dots * RR_{In}}{[(P_1 * RR_{C1}) + (1 - P_1) * 1.0] * \dots * [(P_n * RR_{Cn}) + (1 - P_n) * 1.0]}$$

RR<sub>in</sub> = individual's assigned relative risk (RR) for each risk factor

R<sub>Cn</sub> = consensus-based relative risk for that risk factor

P<sub>n</sub> = consensus-based population prevalence of that risk factor

#### Consider a study participant with the following characteristics:

Female, 65 years old, overweight (waist circumference 40 inches), diabetic, smoker (30 cigs/day)

**Plug in the consensus based RRs and consensus-based prevalences into the equation according to the woman's characteristics:**

$$RR = \frac{RR_{I1} * RR_{I2} * \dots * RR_{In}}{[(P_1 * RR_{C1}) + (1 - P_1) * 1.0] * \dots * [(P_n * RR_{Cn}) + (1 - P_n) * 1.0]}$$

$$RR = \frac{RR_{waist} * RR_{smk} * RR_{diab}}{[(P_{waist} * RR_{waist}) + (1 - P_{waist}) * 1.0] * \dots * [(P_{HDL} * RR_{HDL}) + (1 - P_{HDL}) * 1.0]}$$

$$RR = \frac{2.25 * 5.00 * 2.25}{[(0.453 * 2.25) + (1 - 0.453) * 1.0] * \dots * [(0.125 * 2.25) + (1 - 0.125) * 1.0]}$$

$$RR = \frac{25.31}{10.24} = 2.47$$

YDR places this woman in the “much above average risk” for CHD compared to the average 65 year old woman.
