# Supplementary material for: Validation of a risk prediction tool for coronary heart disease in middle-aged women
Source: Springer Nature journal article supplement (doi:10.1186/s12905-015-0250-x), 2015-11-10
Supplement: MOESM2 [file 9754902]

**Comparison of Your Disease Risk variable categories with NHS variable categories**

| <b>Variable</b>                   | <b>YDR question text</b>                                                                                                                           | <b>YDR risk factor categories</b>                | <b>NHS variable categories</b>                                                               |
|-----------------------------------|----------------------------------------------------------------------------------------------------------------------------------------------------|--------------------------------------------------|----------------------------------------------------------------------------------------------|
| <b>Overweight/Obesity</b>         | If <60: “What is your height?” & “What is your weight?” If ≥60 years old: “What is your waist circumference?”                                      | <u>BMI (if &lt;60 yrs old)</u>                   | 1. Age<60, BMI< 25                                                                           |
|                                   |                                                                                                                                                    | 1. BMI<25                                        | 2. Age<60, BMI≥25 - <29                                                                      |
|                                   |                                                                                                                                                    | 2. BMI≥25-<29                                    | 3. Age<60, BMI≥ 29                                                                           |
|                                   |                                                                                                                                                    | 3. BMI≥ 29                                       | 4. Age>=60, Waist≤35                                                                         |
|                                   |                                                                                                                                                    | <u>Waist size (if ≥60 yrs old)</u>               | 5. Age>=60, Waist>35                                                                         |
|                                   |                                                                                                                                                    | 1. Waist≤35in                                    |                                                                                              |
| <b>Smoking status</b>             | “Do you smoke cigarettes?” If smoker: “How many cigarettes do you typically smoke per day?” If used to smoke: “How long ago did you quit smoking?” | 1. Never smoked                                  | 1. Never smoked                                                                              |
|                                   |                                                                                                                                                    | 2. Current smoker, ≤ 14 cig/day                  | 2. Current smoker, <14 cig/day                                                               |
|                                   |                                                                                                                                                    | 3. Current smoker, 15-25 cig/day                 | 3. Current smoker, 15-24 cig/day                                                             |
|                                   |                                                                                                                                                    | 4. Current smoker, > 25 cig/day                  | 4. Current smoker, ≥ 25 cig/day                                                              |
|                                   |                                                                                                                                                    | 5. Past smoker, quit <2 years ago                | 5. Past smoker, quit <2 years ago                                                            |
|                                   |                                                                                                                                                    | 6. Past smoker, quit 2-10 years ago              | 6. Past smoker, quit 2-10 years ago                                                          |
|                                   |                                                                                                                                                    | 7. Past smoker, quit 10-20 years ago             | 7. Past smoker, quit 10-20 years ago                                                         |
|                                   |                                                                                                                                                    | 8. Past smoker, quit ≥20 years ago               | 8. Past smoker, quit ≥20 years ago                                                           |
| <b>Second hand smoke exposure</b> | “How often are you exposed to second hand smoke?(Never or former smokers only)                                                                     | 1. Almost never/Occasionally exposed             | 1. Never and past smokers who are ‘almost never or occasionally’ exposed AND Current smokers |
|                                   |                                                                                                                                                    | 2. Regularly exposed(*If never or former smoker) | 2. Never and past smokers who are ‘regularly’ exposed                                        |
| <b>Fish</b>                       | “Do you usually eat fish two or more times per week?”                                                                                              | 1. Yes (≥2 serv/wk)                              | 1. Yes (≥2 serv/wk)                                                                          |
|                                   |                                                                                                                                                    | 2. No (<2 serv/wk)                               | 2. No (<2 serv/wk)                                                                           |
| <b>Fruits and Vegetables</b>      | “Do you eat 5 or more servings of fruit and vegetables per day?”                                                                                   | 1. Yes (≥ 5 serv/day)                            | 1. Yes (≥ 5 serv/day)                                                                        |
|                                   |                                                                                                                                                    | 2. No (<5 serv/day)                              | 2. No (<5 serv/day)                                                                          |
| <b>Foods containing</b>           | “Do you eat 3 or                                                                                                                                   | 1. Yes (≥ 3 serv/day)                            | 1. Yes (≥ 3 serv/day)                                                                        |

|                                                     |                                                                                                                                             |                             |                             |
|-----------------------------------------------------|---------------------------------------------------------------------------------------------------------------------------------------------|-----------------------------|-----------------------------|
| <b>whole grains<sup>a</sup></b>                     | more servings of whole grains per day (wheat bread, whole grain pasta, brown rice, oatmeal, whole grain breakfast cereal, bran or popcorn?) | 2. No (<3 serv/day)         | 2. No (<3 serv/day)         |
| <b>Nuts<sup>b</sup></b>                             | “Do you usually eat 3 servings of nuts per week?”                                                                                           | 1. Yes ( $\geq 3$ serv/wk)  | 1. Yes ( $\geq 3$ serv/wk)  |
|                                                     |                                                                                                                                             | 2. No (<3 serv/wk)          | 2. No (<3 serv/wk)          |
| <b>Foods containing saturated fat<sup>c</sup></b>   | “Do you usually eat butter, lard, red meat, cheese or whole milk 2 or more times per day?”                                                  | 1. Yes ( $\geq 2$ serv/day) | 1. Yes ( $\geq 2$ serv/day) |
|                                                     |                                                                                                                                             | 2. No (< 2 serv/day)        | 2. No (< 2 serv/day)        |
| <b>Eat trans fat?<sup>d</sup></b>                   | “Do you eat stick margarine, vegetable shortening, store-bought baked goods (cookies, cakes, pies) or deep-fried fast foods on most days?”  | 1. Yes                      | 1. Yes ( $\geq 5$ serv/wk)  |
|                                                     |                                                                                                                                             | 2. No                       | 2. No (<5 serv/wk)          |
| <b>Foods containing unsaturated fat<sup>e</sup></b> | “Do you eat oil-based salad dressing or use liquid vegetable oil for cooking on most days?”                                                 | 1. Yes                      | 1. Yes ( $\geq 5$ serv/wk)  |
|                                                     |                                                                                                                                             | 2. No                       | 2. No (<5 serv/wk)          |
| <b>Alcohol</b>                                      | “How many servings of alcohol do you have on a typical day?”                                                                                | 1. 0                        | 1. none                     |
|                                                     |                                                                                                                                             | 2. 1 or more                | 2. 1 or more drink/day      |
| <b>Multivitamin or B complex</b>                    | “Do you take a multivitamin or B complex supplement on most days?”                                                                          | 1. Yes                      | 1. Yes ( $\geq 5$ times/wk) |
|                                                     |                                                                                                                                             | 2. No                       | 2. No (<5 times/wk)         |
| <b>Physical Activity</b>                            | “Do you walk                                                                                                                                | 1. Yes                      | 1. $\geq 3$ hours/wk        |

|                                        |                                                                                                                                   |                                                                                      |                                                                                                          |
|----------------------------------------|-----------------------------------------------------------------------------------------------------------------------------------|--------------------------------------------------------------------------------------|----------------------------------------------------------------------------------------------------------|
|                                        | (or do other moderate activity) for at least 30 minutes on most days, or at least 3 hours per week?"                              | 2. No                                                                                | 2. <3hours/wk                                                                                            |
| <b>High blood pressure</b>             | "Have you ever been told that you have high blood pressure (hypertension) or have you ever been given blood pressure medication?" | 1. Yes                                                                               | 1. Yes, high blood pressure or on high blood pressure medication                                         |
|                                        |                                                                                                                                   | 2. No                                                                                | 2. No (no high blood pressure AND not on any high blood pressure medication)                             |
| <b>Diabetes or high blood sugar</b>    | "Have you ever been told that you have diabetes or a problem with high blood sugar?"                                              | 1. Yes                                                                               | 1. Yes                                                                                                   |
|                                        |                                                                                                                                   | 2. No                                                                                | 2. No                                                                                                    |
| <b>Total cholesterol level</b>         | "What is your total cholesterol level?"                                                                                           | 1. $\leq 159$                                                                        | 1. $\leq 159$                                                                                            |
|                                        |                                                                                                                                   | 2. 160-199                                                                           | 2. 160-199                                                                                               |
|                                        |                                                                                                                                   | 3. 200-239 and those who indicated high cholesterol without giving a specific number | 3. 200-239 and those who indicated high cholesterol but did not know specific level and those on statins |
|                                        |                                                                                                                                   | 4. 240-279                                                                           | 4. 240-299                                                                                               |
|                                        |                                                                                                                                   | 5. $\geq 280$                                                                        | 5. $\geq 300$                                                                                            |
| <b>Family history of heart disease</b> | "Has anyone in your immediate family (mother, father, sister, brother) had a heart attack?"                                       | 1. Yes                                                                               | 1. Yes, mother and/or father has had an MI                                                               |
|                                        |                                                                                                                                   | 2. No                                                                                | 2. No, neither mother no father has had an MI                                                            |

<sup>a</sup>Includes wheat germ, oat bran, popcorn, bran, brown rice, dark bread, oats, cooked cereal, and other grains

<sup>b</sup>Includes peanut butter, peanuts, and other nuts

<sup>c</sup>Includes whole milk, butter, cream cheese, cottage cheese, red meat, and other cheese

<sup>d</sup>Includes margarine, store bought fries, pie, sweet roll, cake, cookies, donuts, brownies, fried food at home, and fried food at home

<sup>e</sup>Includes light mayonnaise, mayonnaise, olive oil, and olive oil based salad dressing
